# Supplementary material for: Rapid evaporative ionization mass spectrometry (REIMS) combined with chemometrics for real-time beer analysis
Source: Royal Society of Chemistry journal article supplement (doi:10.1039/d2ay00063f), 2022-01-01
Supplement: d2ay00063f1.pdf [file d2ay00063f1.pdf]

## SUPPLEMENTARY MATERIAL

### Rapid evaporative ionization mass spectrometry (REIMS) combined with chemometrics for real-time beer analysis

Victor Gustavo Kelis Cardoso<sup>a</sup>, Guilherme Post Sabin<sup>a,b</sup>, and Leandro Wang Hantao<sup>\*a</sup>

**Table S1.** Information about samples.

| Sample code | Brand code | Type     | Storage       | Origin country |
|-------------|------------|----------|---------------|----------------|
| ALM         | 1          | Premium  | Aluminium can | Brazil         |
| AMS         | 2          | Premium  | Aluminium can | Brazil         |
| ATO         | 3          | Standard | Glass bottle  | Brazil         |
| ATS         | 4          | Standard | Aluminium can | Brazil         |
| BVR         | 5          | Standard | Aluminium can | Brazil         |
| BOH         | 6          | Premium  | Aluminium can | Brazil         |
| BCL         | 7          | Standard | Aluminium can | Brazil         |
| BCG         | 8          | Standard | Glass bottle  | Brazil         |
| BEL         | 9          | Premium  | Glass bottle  | Brazil         |
| BEW         | 10         | Standard | Glass bottle  | Brazil         |
| BUD         | 11         | Standard | Glass bottle  | Brazil         |
| CAR         | 12         | Standard | Aluminium can | Brazil         |
| COL         | 13         | Standard | Aluminium can | Brazil         |
| COR         | 14         | Standard | Glass bottle  | Mexico         |
| EAI         | 15         | Premium  | Glass bottle  | Brazil         |
| EPA         | 16         | Premium  | Aluminium can | Brazil         |
| EPI         | 17         | Premium  | Aluminium can | Brazil         |
| EWB         | 18         | Standard | Glass bottle  | Brazil         |
| EWE         | 19         | Standard | Glass bottle  | Brazil         |
| EST         | 20         | Standard | Glass bottle  | Spain          |
| HNK         | 21         | Premium  | Glass bottle  | Brazil         |
| IMP         | 22         | Premium  | Glass bottle  | Brazil         |
| ITA         | 23         | Standard | Glass bottle  | Brazil         |
| ITM         | 24         | Standard | Aluminium can | Brazil         |
| PTR         | 25         | Standard | Aluminium can | Brazil         |
| PTO         | 26         | Premium  | Glass bottle  | Brazil         |
| SCH         | 27         | Standard | Aluminium can | Brazil         |
| SEM         | 28         | Premium  | Glass bottle  | Brazil         |
| SKP         | 29         | Premium  | Aluminium can | Brazil         |
| SKO         | 30         | Standard | Aluminium can | Brazil         |
| SOL         | 31         | Standard | Aluminium can | Brazil         |
| STA         | 32         | Standard | Glass bottle  | Brazil         |

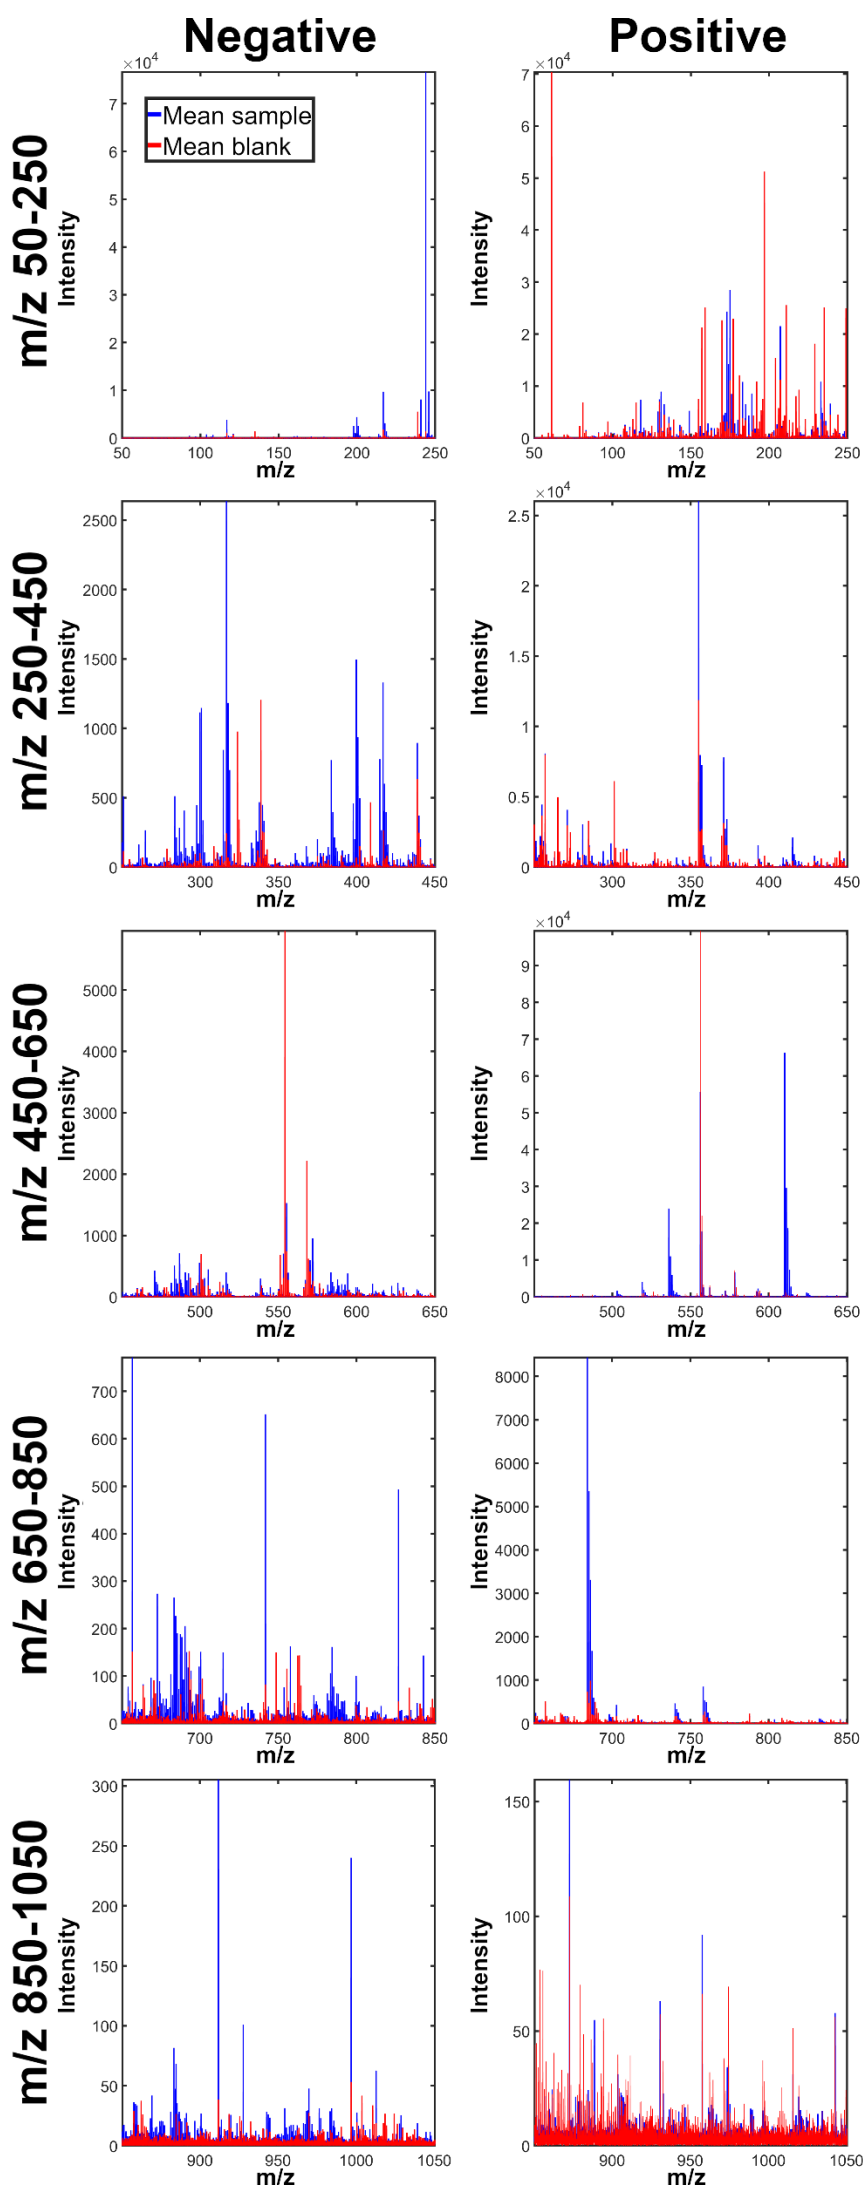

Figure S1. Comparison between mean spectra and mean blank in different spectral ranges in both modes.

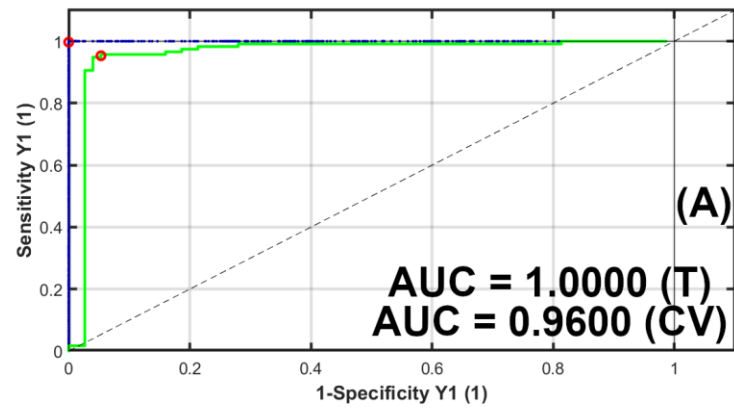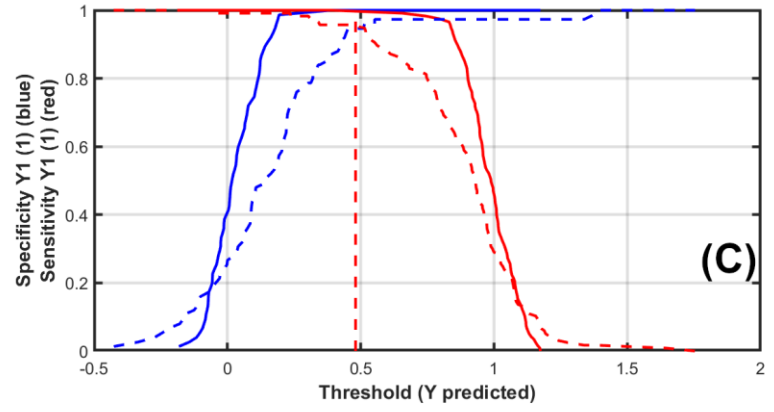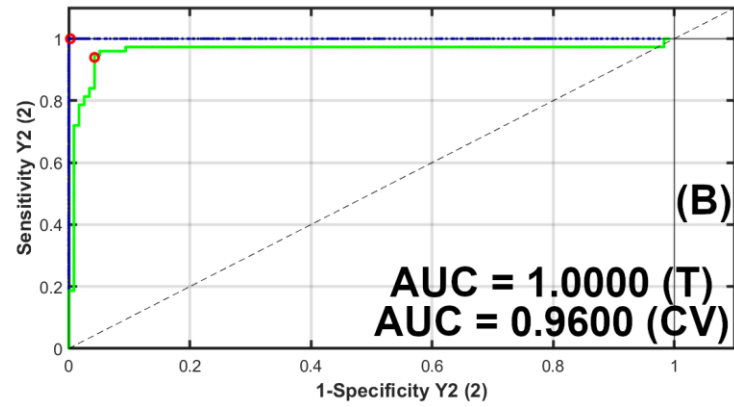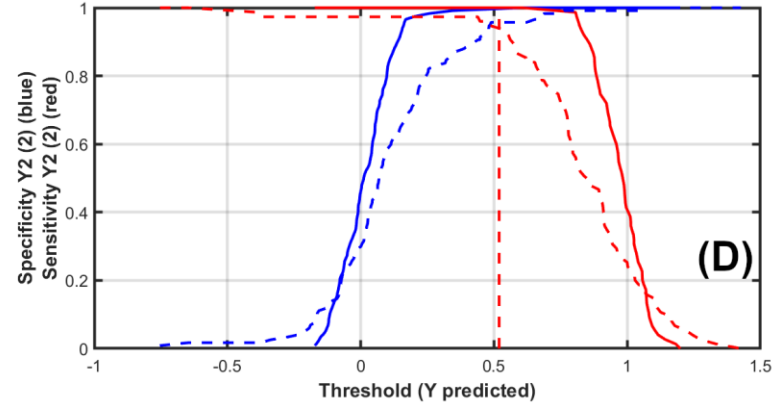

**Figure S2.** Type model: ROC curves of (a) standard American lagers and (b) premium American lagers, being blue lines of training step (T) and green lines of cross-validation (CV). Estimated responses according to threshold of (c) standard American lagers and (d) premium American lagers, being solid lines of training step, dashed lines of cross-validation, blue lines of specificity and red lines of sensitivity.

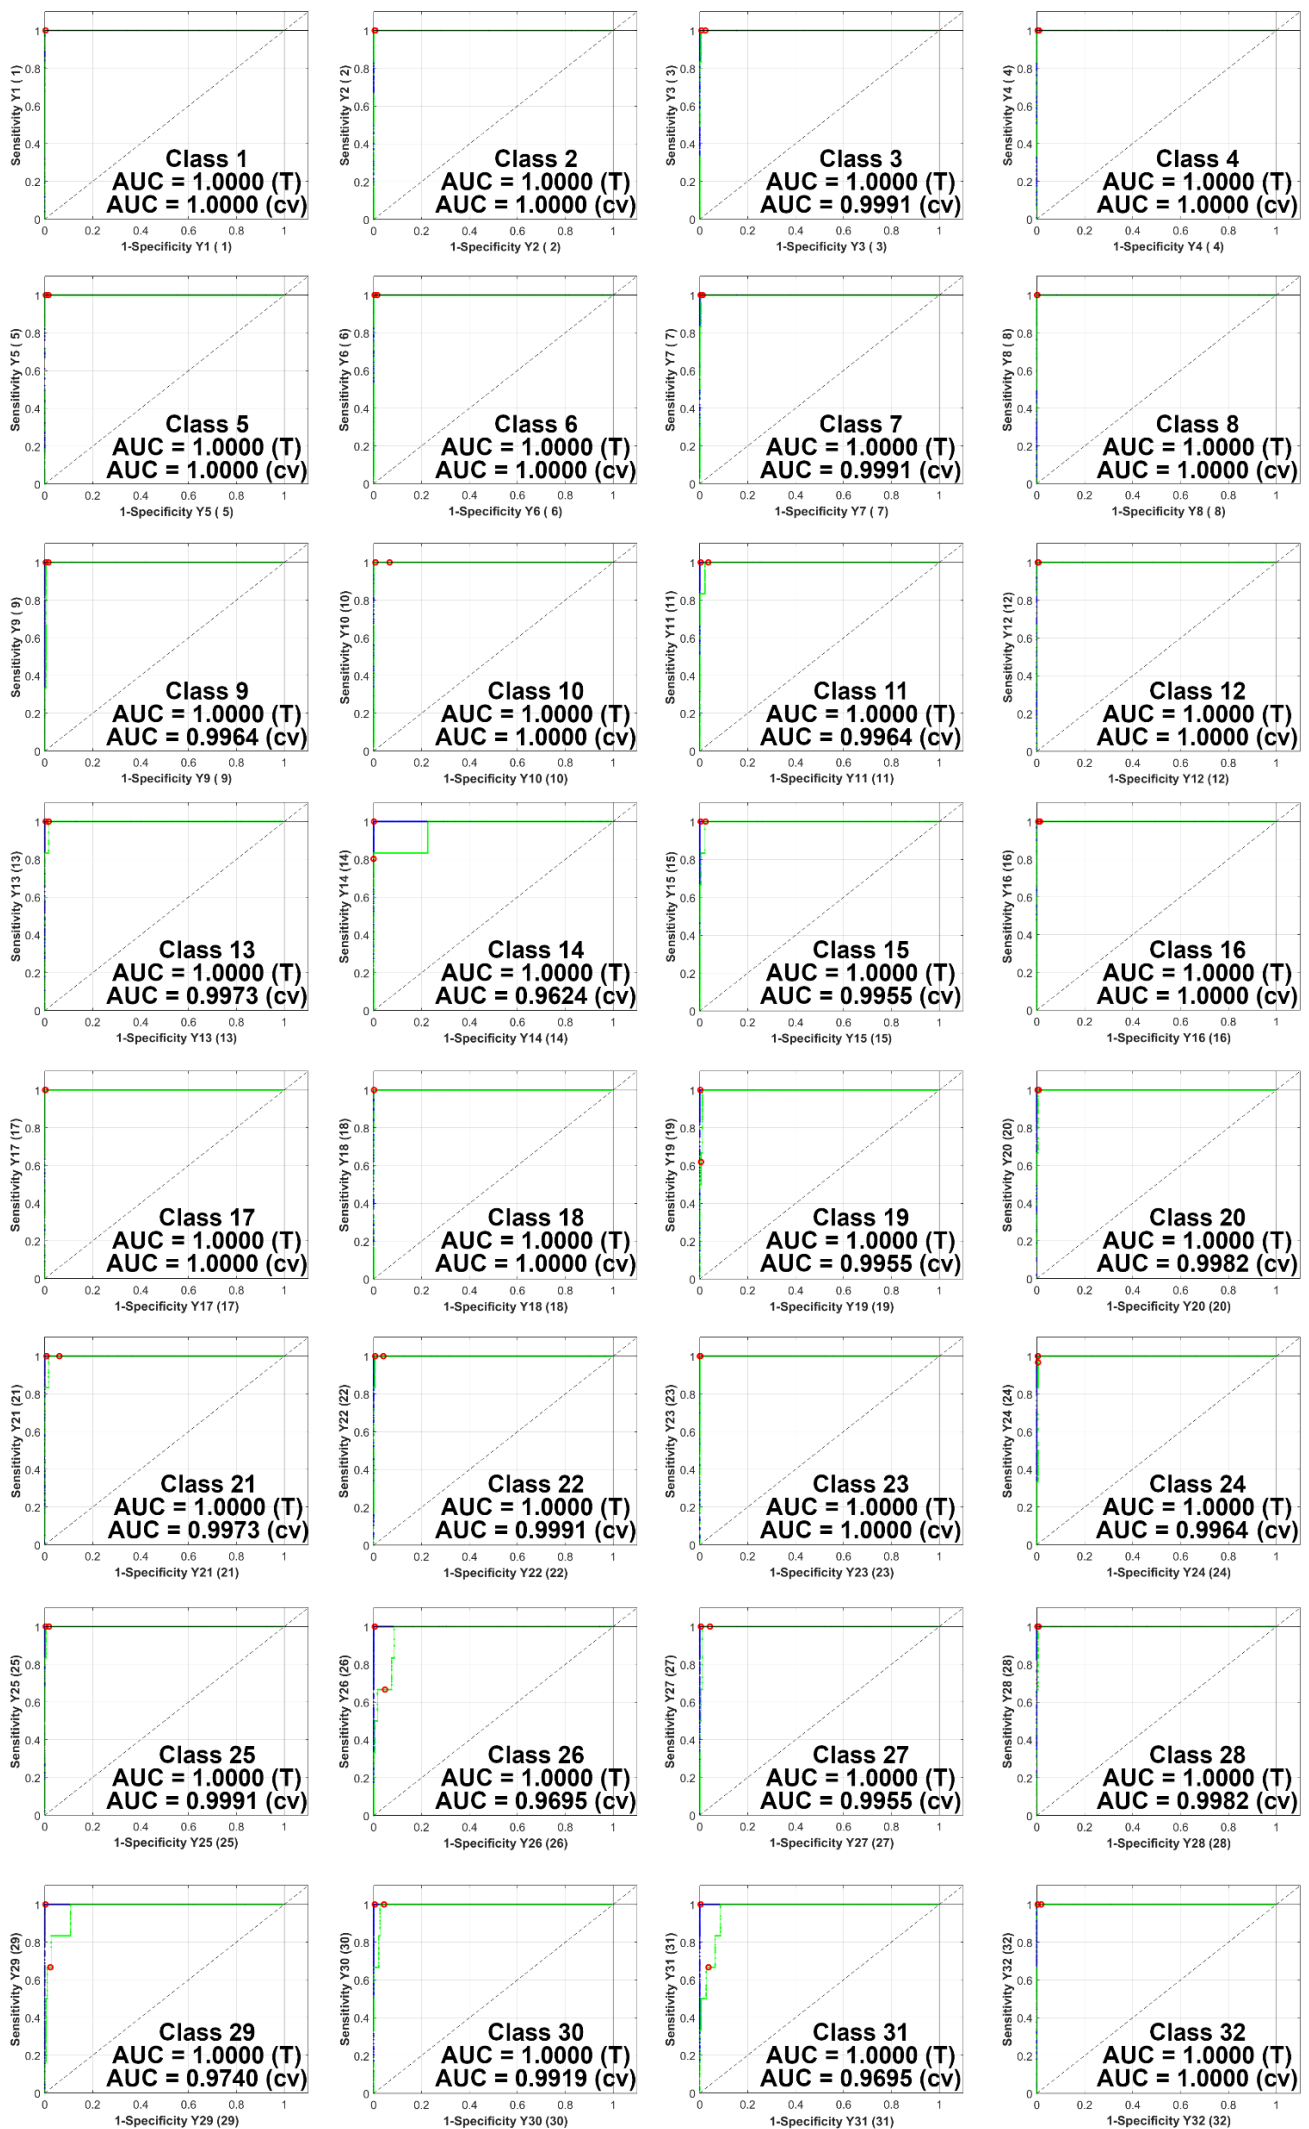

**Figure S3.** Brand model: ROC curves of each class, being blue lines of training step (T) and green lines of cross-validation (CV).

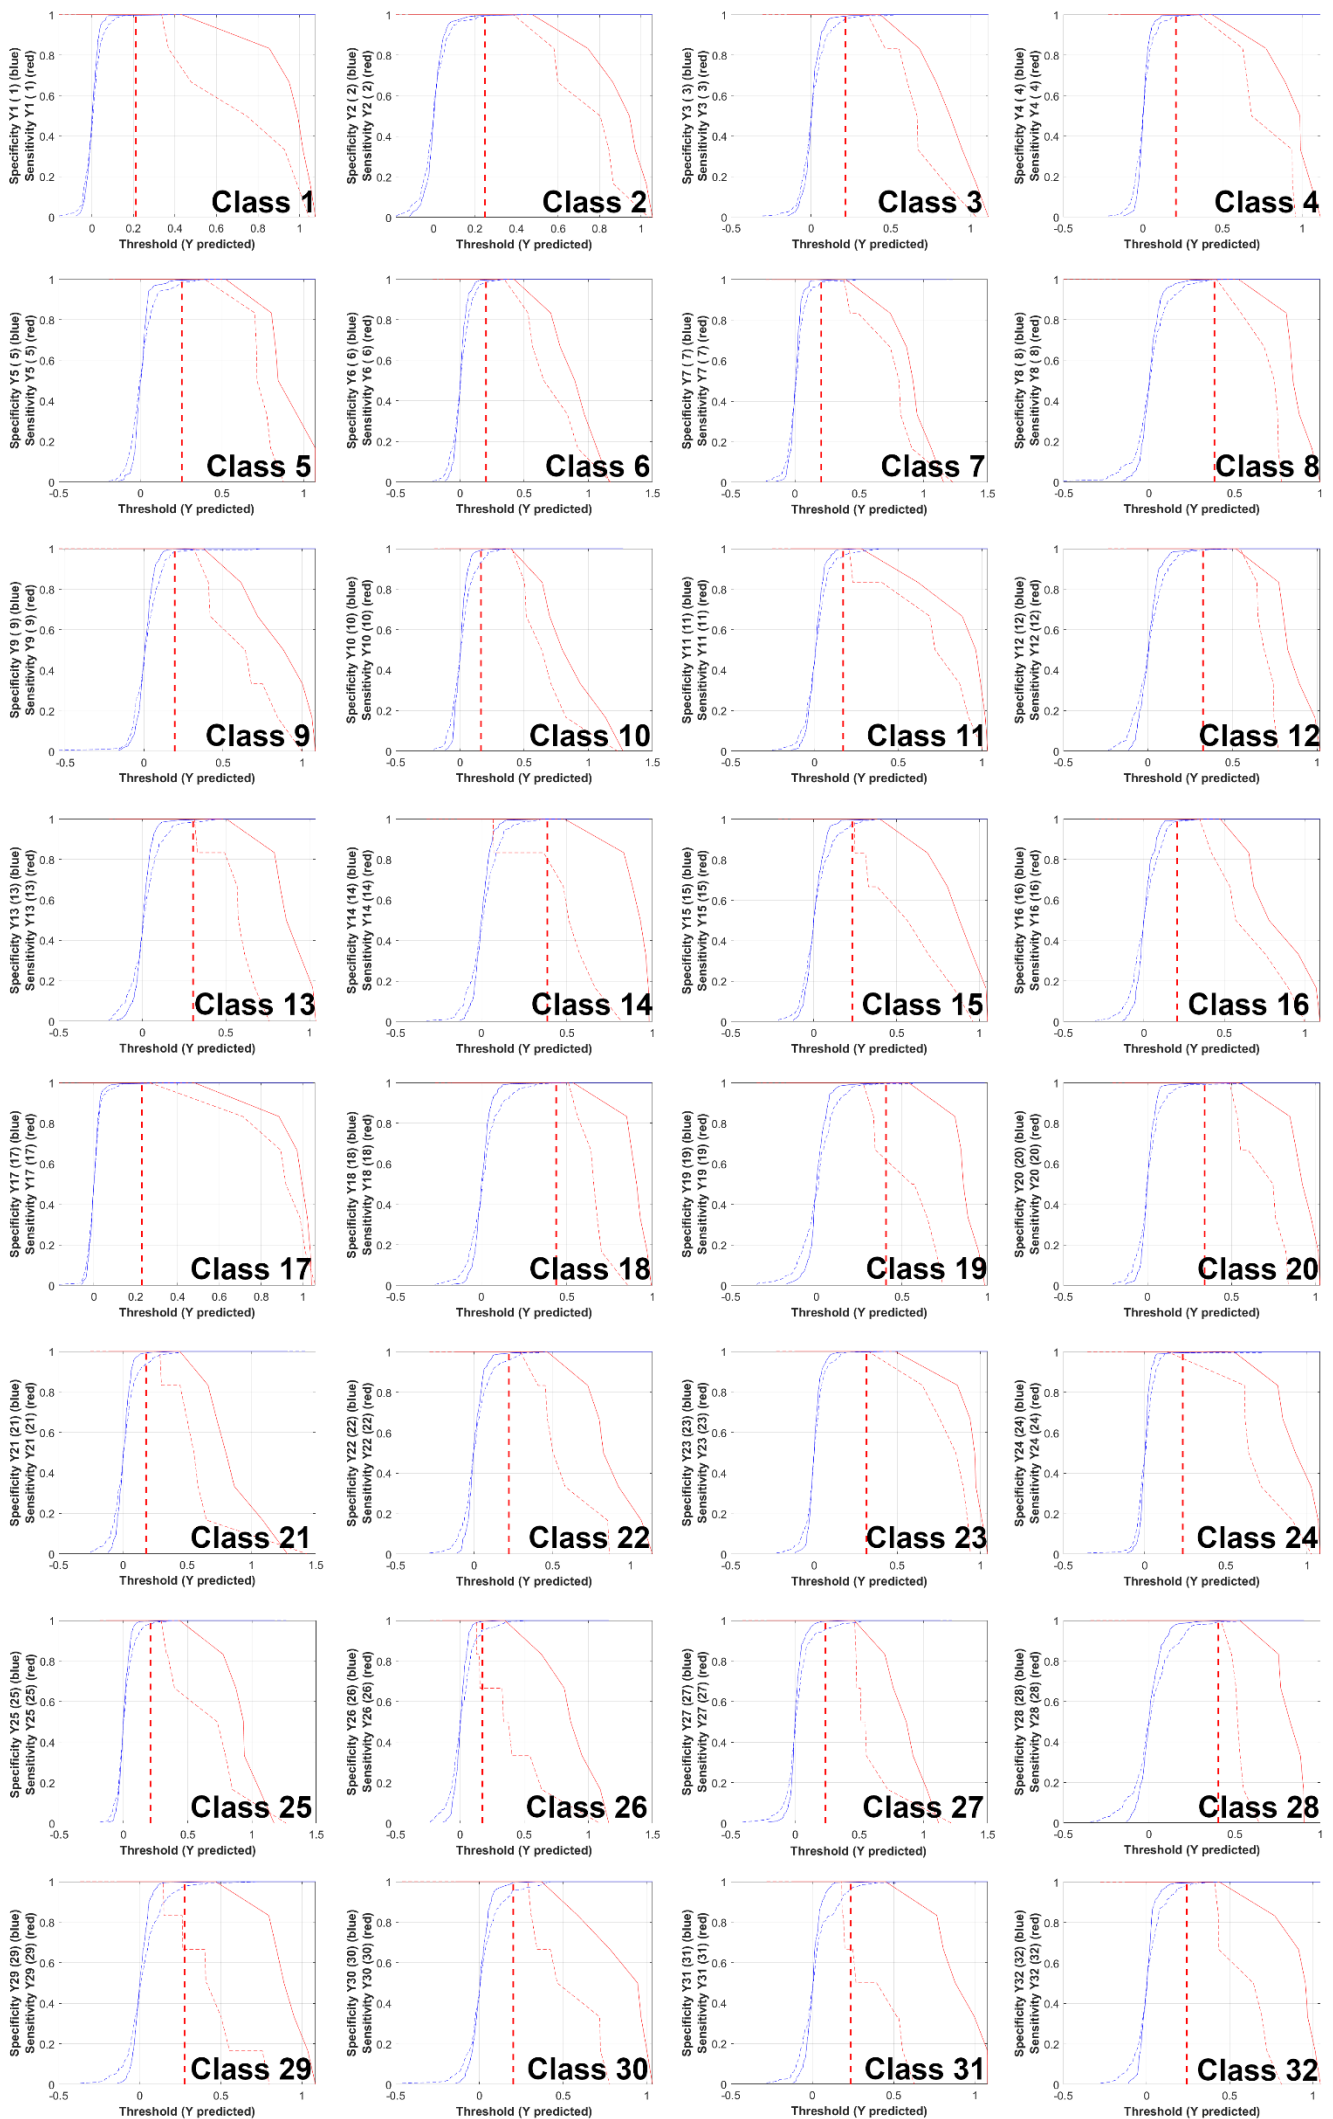

**Figure S4.** Brand model: Estimated responses according to threshold of each class, being solid lines of training step, dashed lines of cross-validation, blue lines of specificity and red lines of sensitivity.

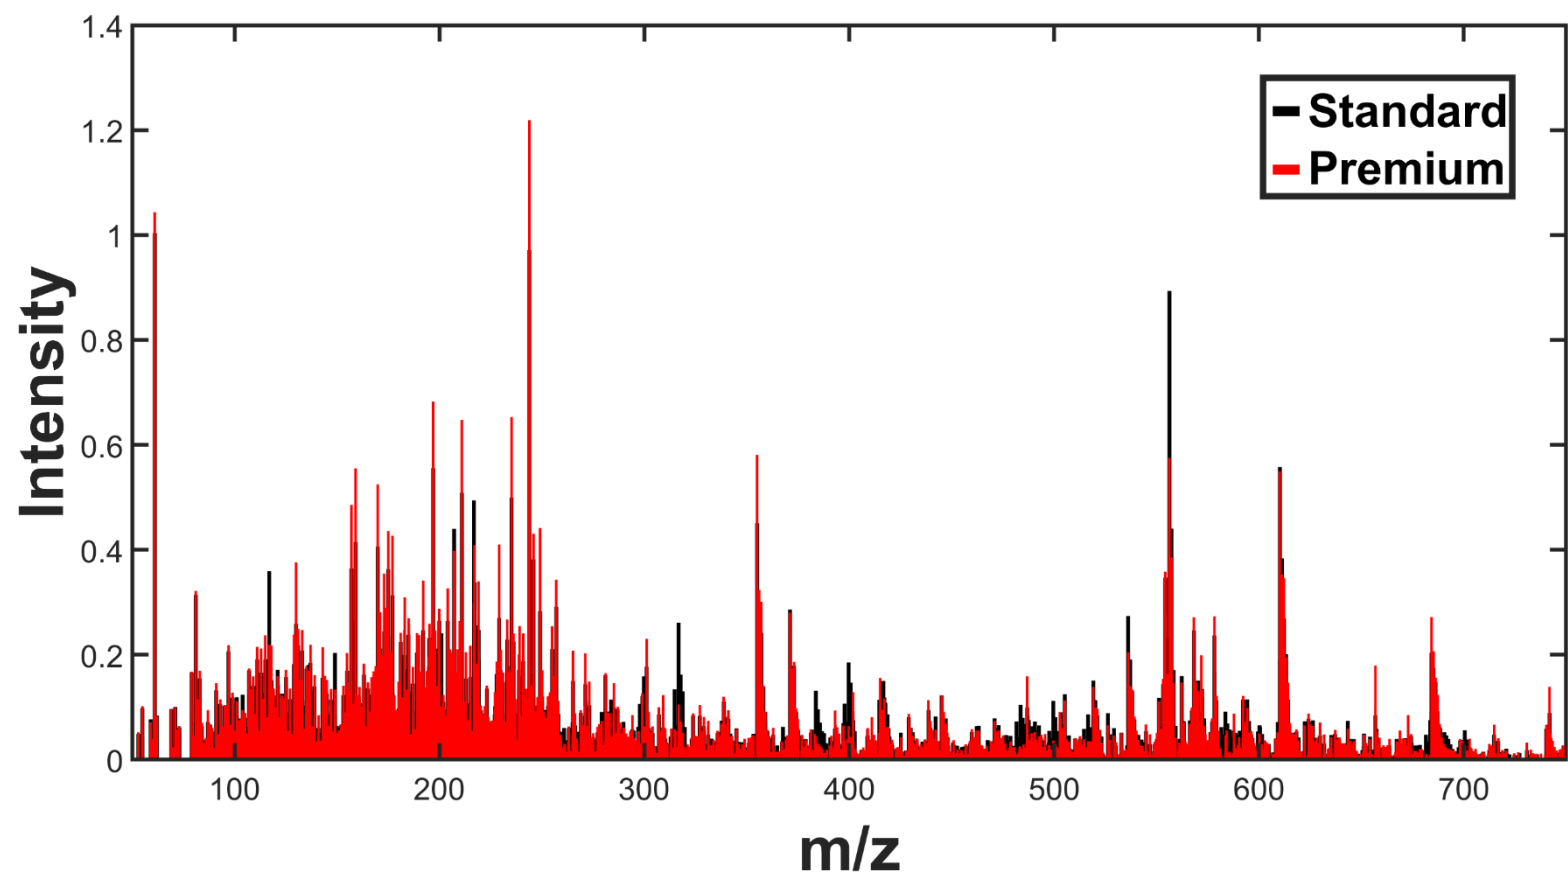

**Figure S5.** Comparison between mean combined spectra of standard American lagers and premium American lagers.

**Table S2.** Assignment of the most intense VIP scores of both models for positive ionization mode.

| Positive            |               |            |                                                                  |      |             |       |
|---------------------|---------------|------------|------------------------------------------------------------------|------|-------------|-------|
| Adduct type         | Accurate mass | Exact mass | Empirical formula                                                | DBE  | Error (ppm) | Model |
| [M+H] <sup>+</sup>  | 61.0637       | 61.0640    | CH <sub>7</sub> N <sub>3</sub>                                   | 0    | -4.87       | Brand |
| [M+Na] <sup>+</sup> | 173.0164      | 173.0174   | C <sub>3</sub> H <sub>6</sub> N <sub>2</sub> O <sub>5</sub> Na   | 1.5  | -6.01       | Brand |
| [M+Na] <sup>+</sup> | 175.0374      | 175.0371   | C <sub>8</sub> H <sub>8</sub> O <sub>3</sub> Na                  | 4.5  | 1.64        | Brand |
| [M+H] <sup>+</sup>  | 177.0784      | 177.0790   | C <sub>10</sub> H <sub>11</sub> NO <sub>2</sub>                  | 6    | -3.27       | Brand |
| [M+H] <sup>+</sup>  |               | 177.0776   | C <sub>8</sub> H <sub>9</sub> N <sub>4</sub> O                   | 6.5  | 4.31        |       |
| [M+Na] <sup>+</sup> |               | 177.0766   | C <sub>8</sub> H <sub>12</sub> NO <sub>2</sub> Na                | 3    | 10.32       |       |
| [M+H] <sup>+</sup>  | 183.0412      | 183.0406   | C <sub>7</sub> H <sub>7</sub> N <sub>2</sub> O <sub>4</sub>      | 5.5  | 3.38        | Both  |
| [M+Na] <sup>+</sup> | 185.0421      | 185.0426   | C <sub>6</sub> H <sub>10</sub> O <sub>5</sub> Na                 | 1.5  | -2.66       | Both  |
| -                   | 196.9477      | -          | -                                                                | -    | -           | Both  |
| [M+Na] <sup>+</sup> | 207.1725      | 207.1725   | C <sub>12</sub> H <sub>24</sub> ONa                              | 0.5  | 0           | Brand |
| [M+H] <sup>+</sup>  |               | 207.1735   | C <sub>12</sub> H <sub>21</sub> N <sub>3</sub>                   | 4    | -5.06       |       |
| [M+Na] <sup>+</sup> | 229.1429      | 229.1429   | C <sub>11</sub> H <sub>18</sub> N <sub>4</sub> Na                | 4.5  | 0           | Brand |
| [M+H] <sup>+</sup>  |               | 229.1426   | C <sub>10</sub> H <sub>19</sub> N <sub>3</sub> O <sub>3</sub>    | 3    | 1.13        |       |
| [M+H] <sup>+</sup>  |               | 229.1440   | C <sub>12</sub> H <sub>21</sub> O <sub>4</sub>                   | 2.5  | -4.73       |       |
| -                   | 233.0847      | -          | -                                                                | -    | -           | Brand |
| [M+H] <sup>+</sup>  | 235.2058      | 235.2062   | C <sub>16</sub> H <sub>27</sub> O                                | 3.5  | -1.66       | Both  |
| [M+H] <sup>+</sup>  |               | 235.2048   | C <sub>14</sub> H <sub>25</sub> N <sub>3</sub>                   | 4    | 4.05        |       |
| [M+Na] <sup>+</sup> |               | 235.2038   | C <sub>14</sub> H <sub>28</sub> ONa                              | 0.5  | 8.57        |       |
| [M+H] <sup>+</sup>  | 249.1123      | 249.1127   | C <sub>14</sub> H <sub>17</sub> O <sub>4</sub>                   | 6.5  | -1.54       | Both  |
| [M+Na] <sup>+</sup> |               | 249.1130   | C <sub>15</sub> H <sub>16</sub> NONa                             | 8    | -0.66       |       |
| [M+Na] <sup>+</sup> | 301.1368      | 301.1376   | C <sub>11</sub> H <sub>22</sub> N <sub>2</sub> O <sub>6</sub> Na | 1.5  | -2.51       | Type  |
| [M+H] <sup>+</sup>  |               | 301.1386   | C <sub>11</sub> H <sub>19</sub> N <sub>5</sub> O <sub>5</sub>    | 5    | -6.04       |       |
| [M+Na] <sup>+</sup> | 355.0622      | 355.0655   | C <sub>14</sub> H <sub>12</sub> N <sub>4</sub> O <sub>6</sub> Na | 10.5 | -9.16       | Brand |
| -                   | 536.1676      | -          | -                                                                | -    | -           | Both  |
| [M+H] <sup>+</sup>  | 556.2771      | 556.2771   | C <sub>28</sub> H <sub>38</sub> N <sub>5</sub> O <sub>7</sub>    | 12.5 | 0           | Both  |
| [M+Na] <sup>+</sup> | 557.2775      | 557.2753   | C <sub>32</sub> H <sub>40</sub> NO <sub>6</sub> Na               | 13   | 3.89        | Brand |
| [M+Na] <sup>+</sup> |               | 557.2740   | C <sub>30</sub> H <sub>38</sub> N <sub>4</sub> O <sub>5</sub> Na | 13.5 | 6.30        |       |
| -                   | 610.1825      | -          | -                                                                | -    | -           | Both  |
| -                   | 611.1830      | -          | -                                                                | -    | -           | Brand |
| -                   | 612.1834      | -          | -                                                                | -    | -           | Both  |

**Table S3.** Assignment of the most intense VIP scores of both models for negative ionization mode.

| <b>Negative</b>    |               |            |                                                               |      |             |       |
|--------------------|---------------|------------|---------------------------------------------------------------|------|-------------|-------|
| Adduct type        | Accurate mass | Exact mass | Empirical formula                                             | DBE  | Error (ppm) | Model |
| -                  | 134.8950      | -          | -                                                             | -    | -           | Brand |
| -                  | 200.8644      | -          | -                                                             | -    | -           | Brand |
| -                  | 216.8515      | -          | -                                                             | -    | -           | Brand |
| -                  | 238.8413      | -          | -                                                             | -    | -           | Brand |
| -                  | 240.9022      | -          | -                                                             | -    | -           | Brand |
| -                  | 243.9035      | -          | -                                                             | -    | -           | Both  |
| [M+H] <sup>+</sup> | 554.2615      | 554.2615   | C <sub>28</sub> H <sub>36</sub> N <sub>5</sub> O <sub>7</sub> | 13.5 | 0           | Brand |
